# Supplementary material for: Impacts of glacier changes on precipitation in the Tibetan Plateau
Source: Copernicus journal article supplement (doi:10.5194/egusphere-2024-826), 2024-03-25
Supplement: Supplementary file 1 [file egusphere-2024-826-supplement.pdf]

## Impacts of glacier changes on precipitation in the Tibetan Plateau

Qian Lin <sup>1</sup>, Jie Chen<sup>1</sup>, Deliang Chen<sup>2</sup>

<sup>1</sup> State Key Laboratory of Water Resources Engineering and Management, Wuhan University, Wuhan, China.

<sup>2</sup> Department of Earth Sciences, University of Gothenburg, Gothenburg, Sweden.

Correspondence to: Jie Chen ([jiechen@whu.edu.cn](mailto:jiechen@whu.edu.cn))

**This file includes:**

Figures S1 to S8

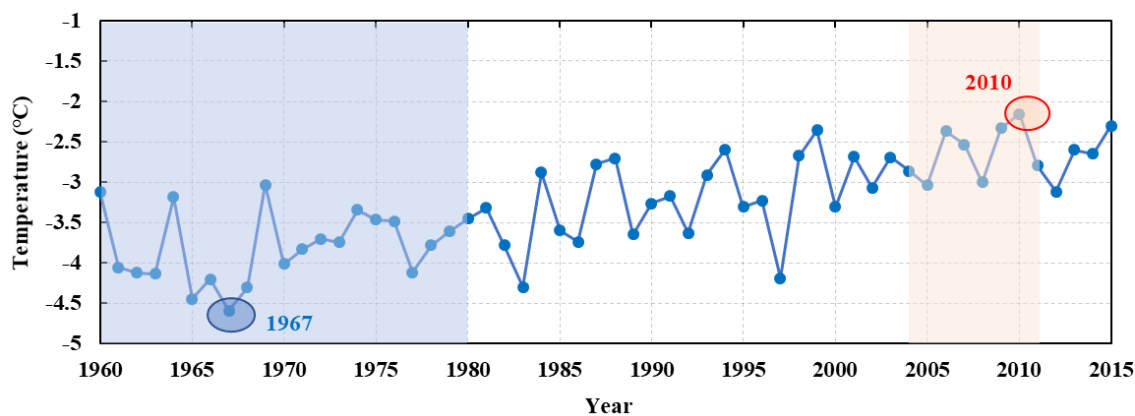

**Figure S1.** Regional mean temperature of the Tibetan Plateau from 1960 to 2015 calculated based on ERA5 data.

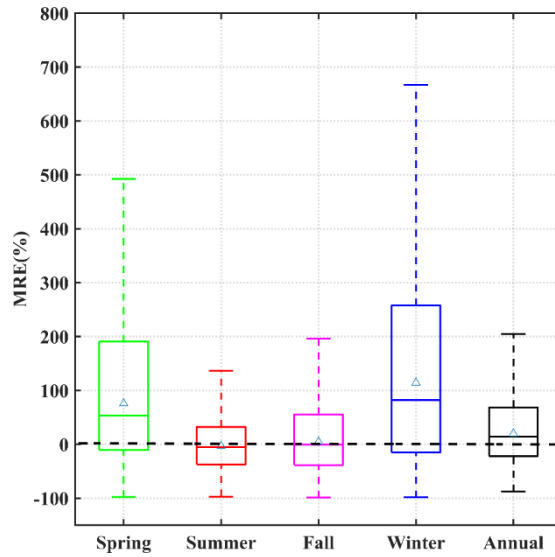

**Figure S2.** Boxplot of mean daily precipitation MREs for 2010-GI2 in four seasons and the whole year of 2010, calculated based on the GPM. The triangles denote the mean values.

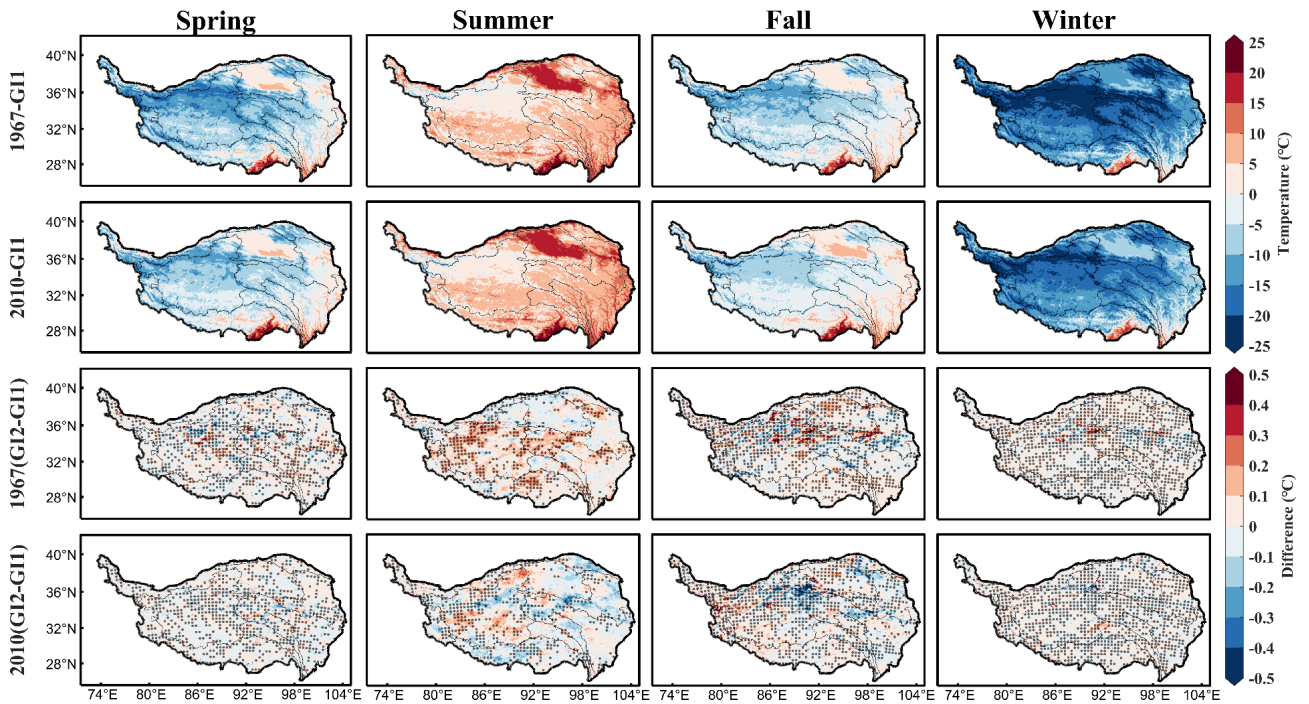

**Figure S3.** Spatial distributions of mean daily T2 for 1967-GI1 (top row), 2010-GI1 (second row), and differences between GI1 and GI2 in 1967 (cold year, third row) and 2010 (warm year, bottom row). Stippled regions indicate statistically significant differences at the 10% significance level.

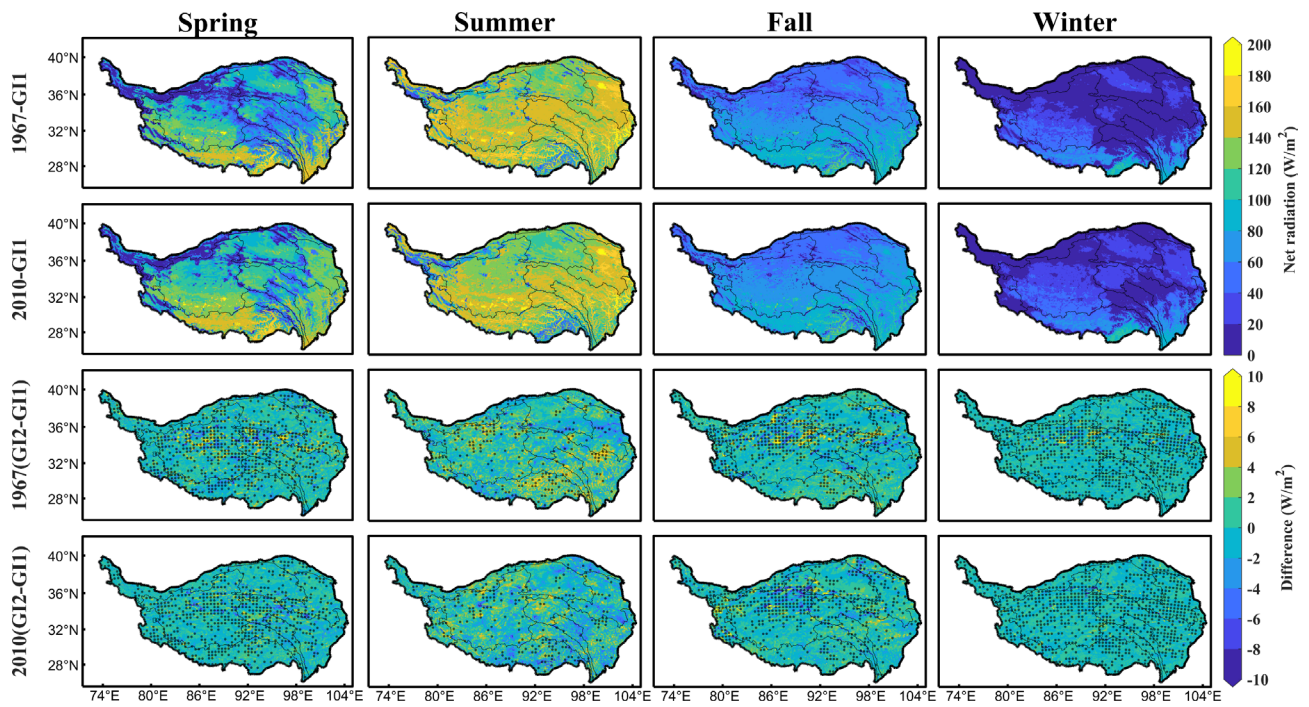

**Figure S4.** Spatial distributions of mean daily net radiation of 1967-GI1 (top row), 2010-GI1 (second row), and differences between GI1 and GI2 in 1967 (cold year, third row) and 2010 (warm year, bottom row). Stippled regions indicate statistically significant differences at the 10% significance level.

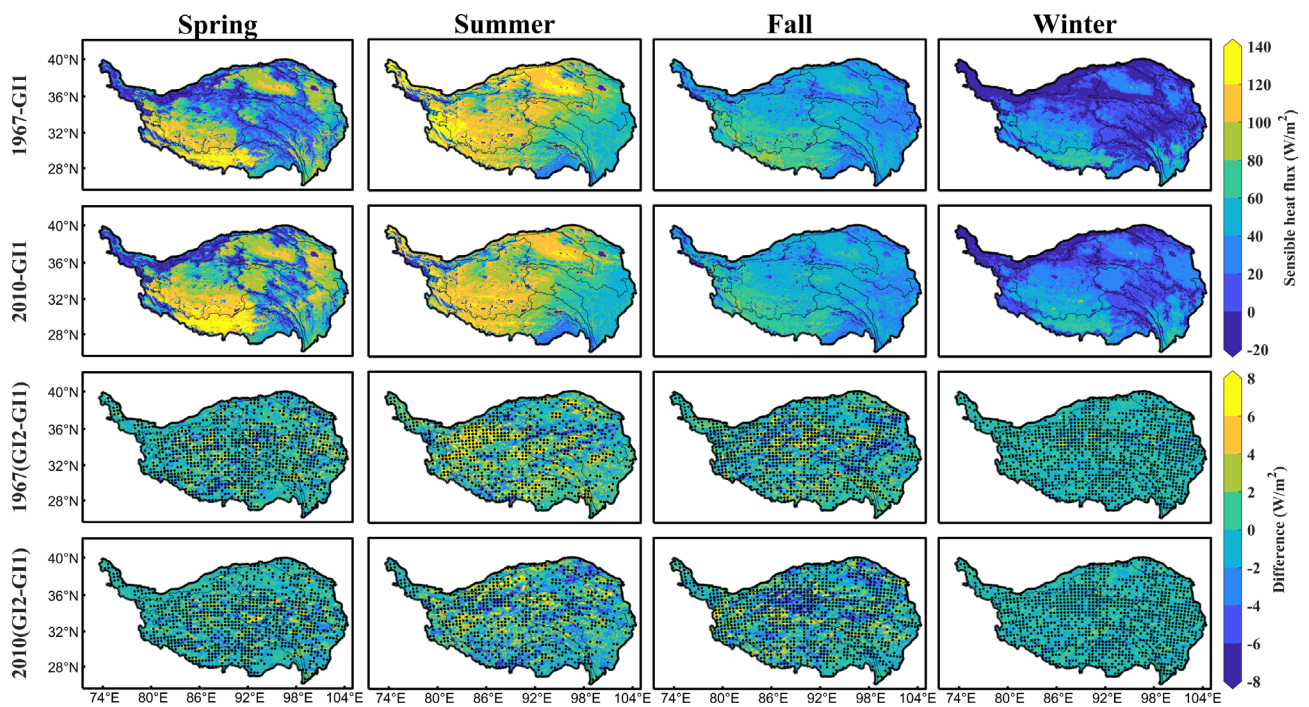

**Figure S5.** Spatial distributions of mean daily sensible heat flux for 1967-GI1 (top row), 2010-GI1 (second row), and differences between GI1 and GI2 in 1967 (cold year, third row) and 2010 (warm year, bottom row). Stippled regions indicate statistically significant differences at the 10% significance level.

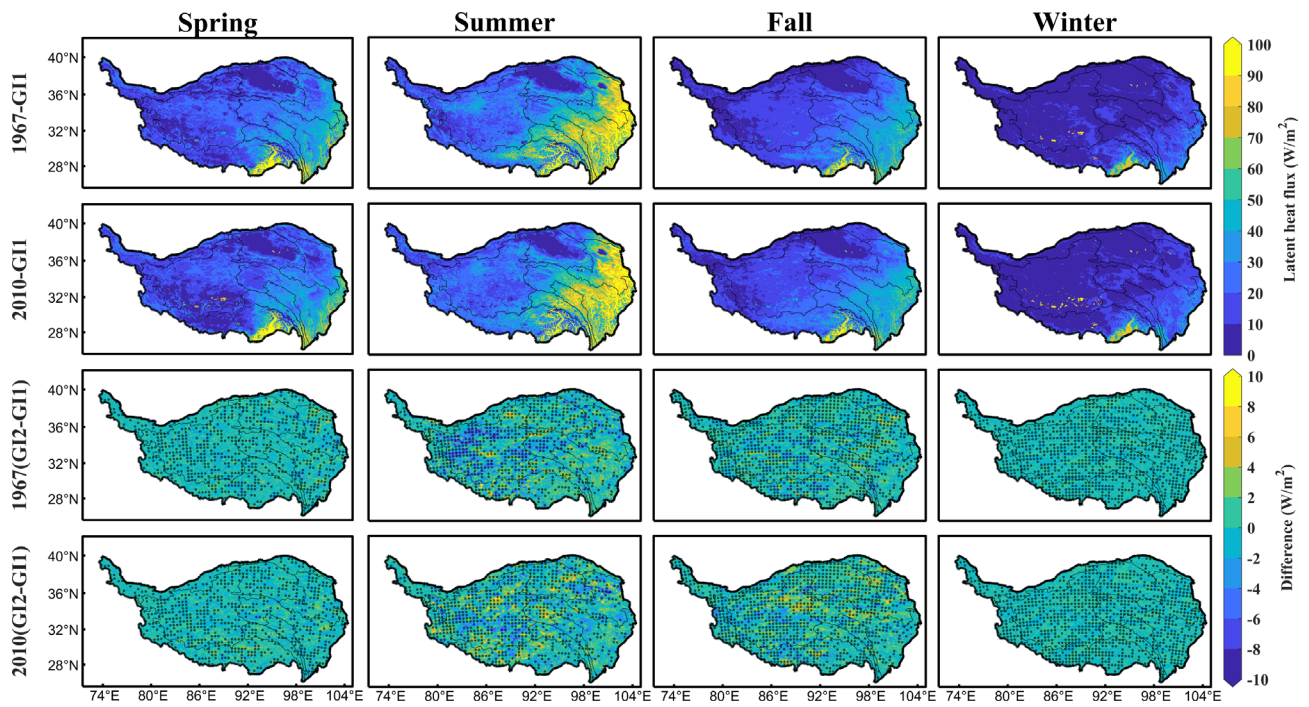

**Figure S6.** Spatial distributions of mean daily latent heat flux of 1967-GI1 (top row), 2010-GI1 (second row), and Differences between GI1 and GI2 in 1967 (cold year, third row) and 2010 (warm year, bottom row). Stippled regions indicate statistically significant differences at the 10% significance level.

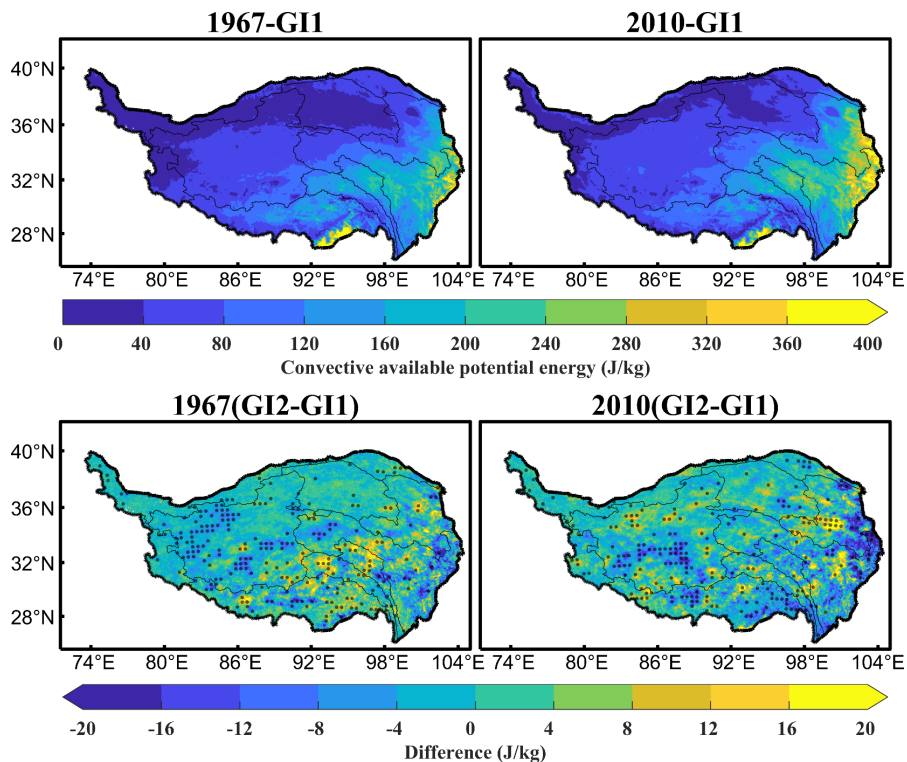

**Figure S7.** Spatial distributions of summer mean daily convective available potential energy (CAPE) for 1967-GI1, 2010-GI1, and differences between GI1 and GI2 in 1967 (cold year) and 2010 (warm year). Stippled regions indicate statistically significant differences at the 10% significance level.

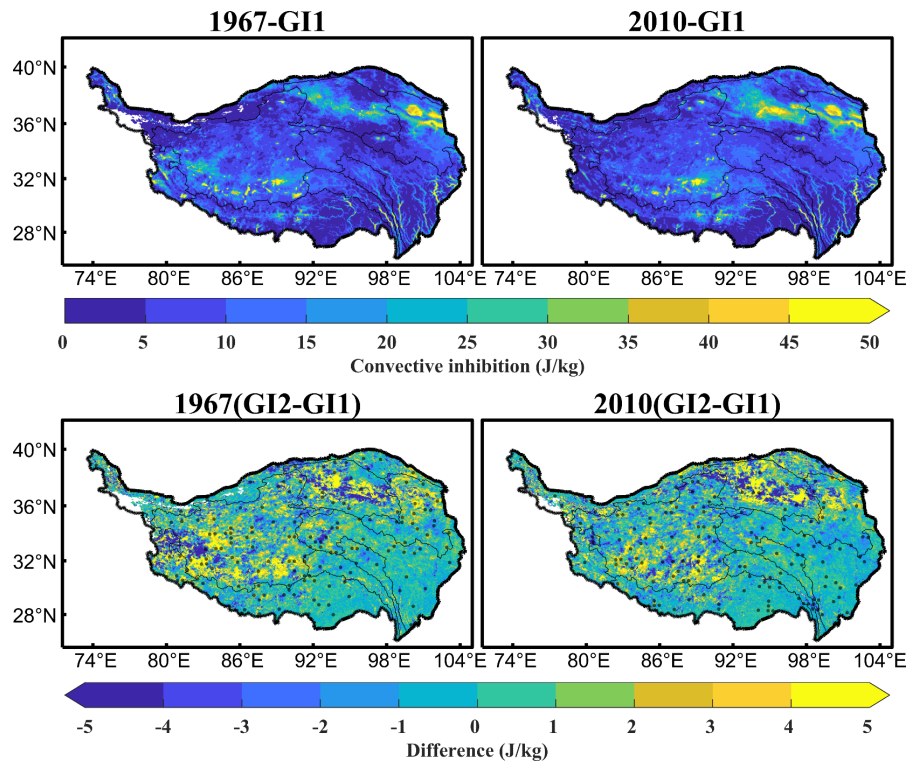

**Figure S8. Spatial distributions of summer mean daily convective inhibition (CIN) for 1967-GI1, 2010-GI1, and differences between GI1 and GI2 in 1967 (cold year) and 2010 (warm year). Stippled regions indicate statistically significant differences at the 10% significance level.**
